# Supplementary material for: Race/Ethnicity and the Prognostic Implications of Coronary Artery Calcium for All‐Cause and Cardiovascular Disease Mortality: The Coronary Artery Calcium Consortium
Source: PubMed Central journal article supplement — J Am Heart Assoc. 2018 Oct 9;7(20):e010471. doi: 10.1161/JAHA.118.010471 (PMC6474975; doi:10.1161/jaha.118.010471), 2018-10-09
Supplement: JAH3-7-e010471-s001.pdf [file JAH3-7-e010471-s001.pdf]

# **SUPPLEMENTAL MATERIAL**

**Table S1. Overall and sex stratified distribution of coronary artery calcium by race/ethnicity.**

| <b>Overall</b>  | <b>Total<br/>(N=42224)</b> | <b>White<br/>(N=38,277)</b> | <b>Asian<br/>(N=1,621)</b> | <b>Black<br/>(N=977)</b> | <b>Hispanic<br/>(N=1,349)</b> | <b>p-<br/>value</b> |
|-----------------|----------------------------|-----------------------------|----------------------------|--------------------------|-------------------------------|---------------------|
| CAC 0           | 18776,<br>44.5%            | 16933, 44.2%                | 794, 49.0%                 | 429, 43.9%               | 620, 46.0%                    | 0.004               |
| CAC 1-99        | 12971,<br>30.7%            | 11757, 30.7%                | 463, 28.6%                 | 321, 32.9%               | 430, 31.9%                    |                     |
| CAC 100-<br>399 | 5842, 13.8%                | 5363, 14.0%                 | 200, 12.3%                 | 125, 12.8%               | 154, 11.4%                    |                     |
| CAC ≥ 400       | 4635, 11.0%                | 4224, 11.0%                 | 164, 10.1%                 | 102, 10.4%               | 145, 10.8%                    |                     |
|                 |                            |                             |                            |                          |                               |                     |
| <b>Women</b>    | <b>(N=14788)</b>           | <b>(N=13288)</b>            | <b>(N=589)</b>             | <b>(N=391)</b>           | <b>(N=520)</b>                | <b>&lt;0.001</b>    |
| CAC 0           | 8818, 59.6%                | 7929, 59.7%                 | 380, 64.5%                 | 193, 49.4%               | 316, 60.8%                    |                     |
| CAC 1-99        | 3805, 25.7%                | 3427, 25.8%                 | 125, 21.2%                 | 124, 31.7%               | 129, 24.8%                    |                     |
| CAC 100-<br>399 | 1412, 9.6%                 | 1279, 9.6%                  | 51, 8.7%                   | 39, 9.97%                | 43, 8.3%                      |                     |
| CAC ≥400        | 753, 5.1%                  | 653, 4.9%                   | 33, 5.6%                   | 35, 8.95%                | 32, 6.2%                      |                     |
|                 |                            |                             |                            |                          |                               |                     |
| <b>Men</b>      | <b>(N= 27436)</b>          | <b>(N=24989)</b>            | <b>(N=1032)</b>            | <b>(N=586)</b>           | <b>(N=829)</b>                | <b>0.01</b>         |
| CAC 0           | 9,958, 36.3%               | 9004, 36.0%                 | 414, 40.1%                 | 236, 40.3%               | 304, 36.7%                    |                     |
| CAC 1-99        | 9,166, 33.4%               | 8330, 33.3%                 | 338, 32.8%                 | 197, 33.6%               | 301, 36.3%                    |                     |
| CAC 100-<br>399 | 4,430, 16.2%               | 4084, 16.3%                 | 149, 14.4%                 | 86, 14.7%                | 111, 13.4%                    |                     |
| CAC ≥400        | 3,882, 14.2%               | 3571, 14.3%                 | 131, 12.7%                 | 67, 11.4%                | 113, 13.6%                    |                     |

P-values derived from chi-square tests of the association of coronary artery calcium (CAC) and race/ethnicity.

**Table S2. Cumulative incidence and incidence rates of all-cause and CVD-specific mortality rates by CAC group and race/ethnicity, in women.**

|                       | <b>CAC 0</b>       | <b>CAC 1-99</b>   | <b>CAC 100-399</b> | <b>CAC ≥ 400</b>  |
|-----------------------|--------------------|-------------------|--------------------|-------------------|
| <b>White women</b>    |                    |                   |                    |                   |
| Death (n, %)          | 177, 2.2%          | 171, 5.0%         | 114, 8.9%          | 121, 18.5%        |
| Per 1000              | 2.0 (1.7, 2.3)     | 4.5 (3.9, 5.2)    | 8.3 (6.9, 10.0)    | 18.9 (15.8, 22.6) |
| CVD Death (n, %)      | 25, 0.32%          | 34, 0.99%         | 37, 2.9%           | 52, 8.0%          |
| Per 1000              | 0.29 ( 0.19, 0.42) | 0.89 ( 0.64, 1.3) | 2.7 (2.0, 3.7)     | 8.1 (6.2, 10.7)   |
| <b>Asian women</b>    |                    |                   |                    |                   |
| Death (n, %)          | 4, 1.1%            | 6, 4.8%           | 5, 9.8%            | 4, 12.1%          |
| Per 1000              | 0.87 (0.33, 2.3)   | 4.2 (1.9, 9.4)    | 9.6 (4.0, 23.0)    | 12.9 (4.9, 34.5)  |
| CVD Death (n, %)      | 0, 0%              | 1, 0.80%          | 3, 5.9%            | 2, 6.1%           |
| Per 1000              | -                  | 0.70 (0.10, 5.0)  | 5.8 (1.9, 17.8)    | 6.5 (1.6, 25.9)   |
| <b>Black women</b>    |                    |                   |                    |                   |
| Death (n, %)          | 6, 3.1%            | 8, 6.5%           | 9, 23.1%           | 13, 37.1%         |
| Per 1000              | 3.3 (1.5, 7.2)     | 6.4 (3.2, 12.8)   | 24.3 (12.7, 46.8)  | 57.3 (33.3, 98.7) |
| CVD Death (n, %)      | 3, 1.6%            | 2, 1.6%           | 5, 12.8%           | 7, 20.0%          |
| Per 1000              | 1.6 ( 0.53, 5.0)   | 1.6 ( 0.40, 6.4)  | 13.5 (5.6, 32.5)   | 30.9 (14.7, 64.7) |
| <b>Hispanic women</b> |                    |                   |                    |                   |
| Death (n, %)          | 3, 0.95%           | 8, 6.2%           | 8, 18.6%           | 7, 21.9%          |
| Per 1000              | 0.82 (0.26, 2.5)   | 5.5 (2.8, 11.0)   | 20.0 (10.0, 40.0)  | 24.3 (11.6, 51.0) |
| CVD Death (n, %)      | 2, 0.63%           | 4, 3.1%           | 2, 4.7%            | 5, 15.6%          |
| Per 1000              | 0.55 (0.14, 2.2)   | 2.8 (1.0, 7.3)    | 5.0 (1.3, 20.0)    | 17.4 (7.2, 41.7)  |

**Table S3. Cumulative incidence and incidence rates of all-cause and CVD-specific mortality rates by CAC group and race/ethnicity, in men.**

|                     | <b>CAC 0</b>      | <b>CAC 1-99</b>  | <b>CAC 100-399</b> | <b>CAC ≥400</b>   |
|---------------------|-------------------|------------------|--------------------|-------------------|
| <b>White men</b>    |                   |                  |                    |                   |
| Death (n, %)        | 148, 1.6%         | 271, 3.3%        | 251, 6.2%          | 465, 13.0%        |
| Per 1000            | 1.5 (1.3, 1.7)    | 2.9 (2.5, 3.2)   | 5.5 (4.8, 6.2)     | 12.1 (11.1, 13.3) |
| CVD Death (n, %)    | 33, 0.37%         | 80, 0.96%        | 81, 2.0%           | 170, 4.8%         |
| Per 1000            | 0.33 (0.23, 0.46) | 0.84 (0.68, 1.1) | 1.8 (1.4, 2.2)     | 4.4 (3.8, 5.2)    |
| <b>Asian men</b>    |                   |                  |                    |                   |
| Death (n, %)        | 5, 1.2%           | 9, 2.7%          | 5, 3.4%            | 18, 13.7%         |
| Per 1000            | 0.98 (0.41, 2.4)  | 2.2 (1.1, 4.2)   | 2.9 (1.2, 6.8)     | 12.6 (7.9, 20.0)  |
| CVD Death (n, %)    | 0, 0%             | 0, 0%            | 1, 0.67%           | 9, 6.9%           |
| Per 1000            | -                 | -                | 0.57 (0.08, 4.0)   | 6.3 (3.3, 12.1)   |
| <b>Black men</b>    |                   |                  |                    |                   |
| Death (n, %)        | 10, 4.2%          | 18, 9.1%         | 14, 16.3%          | 19, 28.4%         |
| Per 1000            | 3.9 (2.1, 7.3)    | 8.7 (5.5, 13.9)  | 17.8 (10.5, 30.1)  | 34.8 (22.2, 54.6) |
| CVD Death (n, %)    | 7, 3.0%           | 5, 2.5%          | 6, 7.0%            | 11, 16.4%         |
| Per 1000            | 2.8 (1.3, 5.8)    | 2.4 (1.01, 5.8)  | 7.6 (3.4, 17.0)    | 20.2 (11.2, 36.4) |
| <b>Hispanic men</b> |                   |                  |                    |                   |
| Death (n, %)        | 10, 3.3%          | 15, 5.0%         | 9, 8.1%            | 22, 19.5%         |
| Per 1000            | 2.9 (1.6, 5.5)    | 4.3 (2.6, 7.2)   | 7.5 (3.9, 14.4)    | 20.5 (13.5, 31.1) |
| CVD Death (n, %)    | 4, 1.3%           | 4, 1.3%          | 3, 2.7%            | 10, 8.9%          |
| Per 1000            | 1.2 (0.44, 3.1)   | 1.2 (0.43, 3.1)  | 2.5 (0.81, 7.7)    | 9.3 (5.0, 17.3)   |

**Table S4. Risk of all-cause death associated with CAC for each race/ethnic group, showing unadjusted and minimally adjusted results.†**

|                  | Unadjusted<br>HR (95% CI) | Model 1<br>HR (95% CI) | Model 2<br>HR (95% CI) |
|------------------|---------------------------|------------------------|------------------------|
| <b>White</b>     |                           |                        |                        |
| CAC 0            | 1.0                       | 1.0                    | 1.0                    |
| CAC 1 -99        | 1.9 (1.7 - 2.2)           | 1.2 (1.1 - 1.4)        | 1.2(1.0 - 1.4)         |
| CAC 100-399      | 3.6 (3.1 - 4.1)           | 1.5 (1.3 - 1.8)        | 1.5 (1.2 - 1.7)        |
| CAC ≥ 400        | 7.6 (6.7 - 8.7)           | 2.4 (2.0 - 2.8)        | 2.2 (1.9 - 2.6)        |
| ❖ Log(CAC+1)     | 1.4 (1.3 - 1.4)           | 1.1 (1.1 - 1.2)        | 1.1 (1.1 - 1.2)        |
| ❖ CAC (Yes/No)   | 3.4 (3.0 - 3.8)           | 1.5 (1.3 - 1.7)        | 1.4 (1.2 - 1.6)        |
| <b>Asian</b>     |                           |                        |                        |
| CAC 0            | 1.0                       | 1.0                    | 1.0                    |
| CAC 1-99         | 2.9 (1.3 - 6.6)           | 1.7 (0.7 - 4.1)        | 1.8 (0.7 - 4.2)        |
| CAC 100-399      | 4.7 (1.9 - 11.5)          | 1.7 (0.6 - 4.5)        | 1.7 (0.6 - 4.6)        |
| CAC ≥ 400        | 13.4 (6.2 - 29.2)         | 3.7 (1.5 - 9.2)        | 3.3 (1.3 - 8.6)        |
| ❖ Log (CAC+1)    | 1.5 (1.3 - 1.7)           | 1.3 (1.1 - 1.4)        | 1.2 (1.1 - 1.4)        |
| ❖ CAC (Yes/No)   | 5.2 (2.6 - 10.7)          | 2.0 (0.9 - 4.5)        | 2.0 (0.9 - 4.4)        |
| <b>Blacks</b>    |                           |                        |                        |
| CAC 0            | 1.0                       | 1.0                    | 1.0                    |
| CAC 1-99         | 2.2 (1.2 - 4.1)           | 1.9 (1.0 - 3.6)        | 1.6 (0.8 - 3.0)        |
| CAC 100-399      | 5.4 (2.9 - 10.2)          | 3.9 (2.0 - 7.6)        | 3.0 (1.5 - 6.0)        |
| CAC ≥ 400        | 10.8 (5.9 - 19.6)         | 7.7 (4.1 - 14.6)       | 5.2 (2.7 - 10.0)       |
| ❖ Log (CAC+1)    | 1.4 (1.3 - 1.5)           | 1.3 (1.2 - 1.5)        | 1.3 (1.2 - 1.4)        |
| ❖ CAC (Yes/No)   | 4.2 (2.5 - 7.2)           | 3.1 (1.8 - 5.5)        | 2.4 (1.4 - 4.3)        |
| <b>Hispanics</b> |                           |                        |                        |
| CAC 0            | 1.0                       | 1.0                    | 1.0                    |
| CAC 1-99         | 2.5 (1.3 - 5.0)           | 2.0 (0.99 - 4.0)       | 1.8 (0.9 - 3.6)        |
| CAC 100-399      | 5.7 (2.8 - 11.7)          | 3.7 (1.7 - 8.0)        | 3.0 (1.3 - 6.5)        |
| CAC ≥ 400        | 11.1 (5.7 - 21.3)         | 6.5 (3.1 - 13.6)       | 4.8 (2.3 - 10.3)       |
| ❖ Log (CAC+1)    | 1.4 (1.3 - 1.5)           | 1.3 (1.2 - 1.5)        | 1.3 (1.1 - 1.4)        |
| ❖ CAC (Yes/No)   | 4.7 (2.6 - 8.5)           | 3.0 (1.6 - 5.6)        | 2.4 (1.3 - 4.5)        |

†- Model 1 estimates are adjusted for study site, age and sex, while model 2 estimates are adjusted for model 1 variables and hypertension, hyperlipidemia, cigarette smoking, family history of CVD and diabetes mellitus.

**Table S5. Risk of CVD mortality associated with CAC by race/ethnic group, showing unadjusted and minimally adjusted results.†**

|                   | <b>Unadjusted<br/>SHR (95% CI)</b> | <b>Model 1<br/>SHR (95% CI)</b> | <b>Model 2<br/>SHR (95% CI)</b> |
|-------------------|------------------------------------|---------------------------------|---------------------------------|
| <b>Whites</b>     |                                    |                                 |                                 |
| CAC 0             | 1.0                                | 1.0                             | 1.0                             |
| CAC 1-99          | 2.8 (2.0 – 3.8)                    | 1.7 (1.2 – 2.3)                 | 1.6 (1.1 – 2.2)                 |
| CAC 100-399       | 6.4 (4.6 – 8.7)                    | 2.4 (1.7 – 3.4)                 | 2.2 (1.6 – 3.1)                 |
| CAC ≥ 400         | 15.6 (11.6 – 20.8)                 | 4.1 (2.9 – 5.8)                 | 3.6 (2.5 – 5.1)                 |
| ❖ Log(CAC+1)      | 1.5 (1.5 – 1.6)                    | 1.3 (1.2 – 1.3)                 | 1.2 (1.2 – 1.3)                 |
| ❖ CAC<br>(Yes/No) | 6.1 (4.7 – 8.1)                    | 2.3 (1.7 – 3.0)                 | 2.1 (1.5 – 2.8)                 |
| <b>Asians §</b>   |                                    |                                 |                                 |
| CAC 0             | 1.0                                | 1.0                             | 1.0                             |
| CAC 1-99          | -                                  | -                               | -                               |
| CAC 100-399       | -                                  | -                               | -                               |
| CAC ≥ 400         | -                                  | -                               | -                               |
| ❖ Log (CAC+1)     | 2.3 (1.8 – 3.0)                    | 2.2 (1.7 – 2.9)                 | 2.3 (1.8 – 2.9)                 |
| ❖ CAC<br>(Yes/No) | -                                  | -                               | -                               |
| <b>Blacks</b>     |                                    |                                 |                                 |
| CAC 0             | 1.0                                | 1.0                             | 1.0                             |
| CAC 1-99          | 0.9 (0.4 – 2.4)                    | 0.9 (0.3 – 2.4)                 | 0.7 (0.3 – 2.0)                 |
| CAC 100-399       | 3.9 (1.7 – 9.3)                    | 3.3 (1.2 – 9.4)                 | 2.5 (0.9 – 7.6)                 |
| CAC ≥ 400         | 8.8 (5.9 – 18.9)                   | 7.3 (2.8 – 19.4)                | 4.7 (1.8 – 12.8)                |
| ❖ Log (CAC+1)     | 1.4 (1.3 – 1.6)                    | 1.4 (1.2 – 1.7)                 | 1.3 (1.1 – 1.6)                 |
| ❖ CAC<br>(Yes/No) | 2.9 (1.4 – 5.8)                    | 2.2 (1.0 – 4.9)                 | 1.7 (0.8 – 3.8)                 |
| <b>Hispanics</b>  |                                    |                                 |                                 |
| CAC 0             | 1.0                                | 1.0                             | 1.0                             |
| CAC 1-99          | 1.9 (0.65 – 5.4)                   | 1.7 (0.6 – 5.0)                 | 1.8 (0.9 – 3.6)                 |
| CAC 100-399       | 3.5 (1.1 – 11.3)                   | 2.7 (0.8 – 9.7)                 | 3.0 (1.3 – 6.5)                 |
| CAC ≥ 400         | 11.7 (4.5 – 30.1)                  | 8.9 (2.8 – 28.3)                | 4.8 (2.3 – 10.3)                |
| ❖ Log (CAC+1)     | 1.4 (1.2 – 1.6)                    | 1.4 (1.2 – 1.6)                 | 1.3 (1.1 – 1.4)                 |
| ❖ CAC<br>(Yes/No) | 4.0 (1.7 – 9.7)                    | 2.9 (1.1 – 7.4)                 | 2.4 (1.3 – 4.5)                 |

† - Model 1 estimates were adjusted for study site, age and sex, while model 2 estimates were adjusted for model 1 variables and hypertension, hyperlipidemia, cigarette smoking, family history of CVD and diabetes mellitus.

§ - No CVD deaths noted in Asians with CAC=0, analysis by CAC group and dichotomous CAC not possible.

**Table S6. C-statistics for the overall and sex-specific ROC curves for all-cause and CVD mortality using the Framingham risk scores with and without accounting for CAC, by race/ethnicity.**

| C-statistic      | All                        | Women            | Men              |
|------------------|----------------------------|------------------|------------------|
|                  | <b>ALL-CAUSE MORTALITY</b> |                  |                  |
| <b>Whites</b>    |                            |                  |                  |
| FRS + CAC        | 0.699                      | 0.679            | 0.736            |
| FRS (No CAC)     | 0.649                      | 0.549            | 0.705            |
|                  | <b>&lt;0.001</b>           | <b>&lt;0.001</b> | <b>&lt;0.001</b> |
| <b>Asians</b>    |                            |                  |                  |
| FRS + CAC        | 0.781                      | 0.770            | 0.821            |
| FRS ( No CAC)    | 0.719                      | 0.674            | 0.756            |
|                  | <b>&lt;0.001</b>           | <b>0.02</b>      | <b>0.006</b>     |
| <b>Blacks</b>    |                            |                  |                  |
| FRS + CAC        | 0.740                      | 0.747            | 0.732            |
| FRS (No CAC)     | 0.681                      | 0.677            | 0.691            |
|                  | <b>&lt;0.001</b>           | <b>0.004</b>     | <b>0.03</b>      |
| <b>Hispanics</b> |                            |                  |                  |
| FRS + CAC        | 0.721                      | 0.757            | 0.692            |
| FRS (No CAC)     | 0.632                      | 0.679            | 0.600            |
|                  | <b>&lt;0.001</b>           | <b>0.01</b>      | <b>0.002</b>     |
|                  | <b>CVD MORTALITY</b>       |                  |                  |
| <b>Whites</b>    |                            |                  |                  |
| FRS + CAC        | 0.740                      | 0.786            | 0.774            |
| FRS (No CAC)     | 0.680                      | 0.515            | 0.745            |
|                  | <b>&lt;0.001</b>           | <b>&lt;0.001</b> | <b>&lt;0.001</b> |
| <b>Asians</b>    |                            |                  |                  |
| FRS + CAC        | 0.852                      | 0.763            | 0.855            |
| FRS ( No CAC)    | 0.655                      | 0.676            | 0.662            |
|                  | <b>&lt;0.001</b>           | <b>0.60</b>      | <b>0.004</b>     |
| <b>Blacks</b>    |                            |                  |                  |
| FRS + CAC        | 0.752                      | 0.786            | 0.734            |
| FRS (No CAC)     | 0.698                      | 0.734            | 0.694            |
|                  | <b>0.02</b>                | <b>0.09</b>      | <b>0.17</b>      |
| <b>Hispanics</b> |                            |                  |                  |
| FRS + CAC        | 0.723                      | 0.791            | 0.690            |
| FRS (No CAC)     | 0.670                      | 0.739            | 0.631            |
|                  | <b>0.05</b>                | <b>0.25</b>      | <b>0.11</b>      |

Corresponding p-values testing the differences between AUC c-statistics derived with and without CAC are highlighted in bold-type.

**Table S7. C-statistics for the overall and sex-specific AUC curves for all-cause and CVD mortality using risk factors with and without accounting for CAC, by race/ethnicity.**

|                       | All                    | Women        | Men              |
|-----------------------|------------------------|--------------|------------------|
|                       | <b>ALL-CAUSE DEATH</b> |              |                  |
| <b>Whites</b>         |                        |              |                  |
| Risk factors + CAC    | 0.785                  | 0.778        | 0.791            |
| Risk factors (No CAC) | 0.781                  | 0.774        | 0.786            |
|                       | <b>&lt;0.001</b>       | <b>0.001</b> | <b>&lt;0.001</b> |
| <b>Asians</b>         |                        |              |                  |
| Risk factors + CAC    | 0.831                  | 0.822        | 0.838            |
| Risk factors (No CAC) | 0.823                  | 0.813        | 0.827            |
|                       | <b>0.22</b>            | <b>0.31</b>  | <b>0.30</b>      |
| <b>Blacks</b>         |                        |              |                  |
| Risk factors + CAC    | 0.782                  | 0.771        | 0.796            |
| Risk factors (No CAC) | 0.757                  | 0.742        | 0.772            |
|                       | <b>0.003</b>           | <b>0.02</b>  | <b>0.03</b>      |
| <b>Hispanics</b>      |                        |              |                  |
| Risk factors + CAC    | 0.785                  | 0.888        | 0.742            |
| Risk factors (No CAC) | 0.763                  | 0.873        | 0.715            |
|                       | <b>0.007</b>           | <b>0.16</b>  | <b>0.02</b>      |
|                       | <b>CVD MORTALITY</b>   |              |                  |
| <b>Whites</b>         |                        |              |                  |
| Risk factors + CAC    | 0.819                  | 0.871        | 0.797            |
| Risk factors (No CAC) | 0.814                  | 0.865        | 0.791            |
|                       | <b>&lt;0.001</b>       | <b>0.005</b> | <b>&lt;0.001</b> |
| <b>Asians</b>         |                        |              |                  |
| Risk factors + CAC    | 0.818                  | 0.781        | 0.891            |
| Risk factors (No CAC) | 0.790                  | 0.782        | 0.848            |
|                       | <b>0.04</b>            | <b>0.81</b>  | <b>0.07</b>      |
| <b>Blacks</b>         |                        |              |                  |
| Risk factors + CAC    | 0.790                  | 0.740        | 0.778            |
| Risk factors (No CAC) | 0.753                  | 0.694        | 0.746            |
|                       | <b>0.04</b>            | <b>0.21</b>  | <b>0.23</b>      |
| <b>Hispanics</b>      |                        |              |                  |
| Risk factors + CAC    | 0.770                  | 0.871        | 0.729            |
| Risk factors (No CAC) | 0.745                  | 0.861        | 0.686            |
|                       | <b>0.05</b>            | <b>0.46</b>  | <b>0.04</b>      |

Corresponding p-values testing the differences between AUCs derived with and without CAC are highlighted in bold-type.
